# Supplementary material for: Ecological niche partitioning between Anopheles gambiae molecular forms in Cameroon: the ecological side of speciation
Source: PubMed Central journal article supplement (PMC2698860; doi:10.1186/1472-6785-9-17), 2009-05-21
Supplement: 1472-6785-9-17-S1.pdf [file 1472-6785-9-17-S1.pdf]

|                          | Factor 1 <sup>1</sup><br>(20%) | Factor 2 <sup>2</sup><br>(19%) | Factor 3 <sup>2</sup><br>(10%) | Factor 4 <sup>2</sup><br>(8%) | Factor 5 <sup>2</sup><br>(7%) | Factor 6 <sup>2</sup><br>(6%) | Factor 7 <sup>2</sup><br>(5%) | Factor 8 <sup>2</sup><br>(5%) | Factor 9 <sup>2</sup><br>(4%) | Factor 10 <sup>2</sup><br>(3%) |
|--------------------------|--------------------------------|--------------------------------|--------------------------------|-------------------------------|-------------------------------|-------------------------------|-------------------------------|-------------------------------|-------------------------------|--------------------------------|
| Cropland                 | ++                             | *                              | 0                              | ***                           | ****                          | *                             | *                             | *                             | ***                           | 0                              |
| Distance to water bodies | 0                              | 0                              | 0                              | 0                             | *                             | *                             | *                             | 0                             | 0                             | **                             |
| Distance to localities   | -----                          | 0                              | 0                              | *                             | **                            | ****                          | *                             | **                            | *                             | *                              |
| Distance to roads        | -----                          | **                             | *                              | 0                             | **                            | ****                          | *                             | **                            | 0                             | 0                              |
| Evapotranspiration       | +                              | ****                           | ***                            | 0                             | ****                          | ****                          | *****                         | ***                           | 0                             | *****                          |
| Evergreen Forest         | -                              | ****                           | ****                           | ***                           | **                            | *                             | *                             | *****                         | **                            | **                             |
| Sunlight exposure        | 0                              | **                             | *****                          | ****                          | **                            | ****                          | *****                         | *                             | ***                           | *****                          |
| Forest/savannas mosaic   | -                              | 0                              | *                              | **                            | ****                          | **                            | *                             | ***                           | *                             | 0                              |
| Rainfall                 | 0                              | *****                          | ***                            | ***                           | ***                           | ***                           | *                             | ***                           | ***                           | 0                              |
| Dry savannas             | +                              | *                              | 0                              | *                             | 0                             | *                             | *                             | *                             | **                            | 0                              |
| Deciduous woodland       | +                              | **                             | *                              | *****                         | ***                           | 0                             | *                             | *                             | *                             | **                             |
| Temperature              | +                              | ***                            | ****                           | ****                          | *                             | **                            | **                            | 0                             | ****                          | *                              |
| Altitude                 | -                              | **                             | ****                           | **                            | 0                             | *                             | 0                             | **                            | *                             | *                              |
| Aspect                   | 0                              | 0                              | 0                              | 0                             | *                             | *                             | 0                             | 0                             | **                            | **                             |
| Slope                    | -                              | *                              | *                              | *                             | *                             | *                             | *                             | *                             | *                             | *                              |
| Windspeed                | +++                            | ****                           | *                              | 0                             | ***                           | **                            | **                            | *                             | ***                           | *                              |
| Water vapor pressure     | -                              | 0                              | **                             | **                            | **                            | **                            | **                            | *****                         | *****                         | *                              |

<sup>1</sup>Marginality factor. The symbol “+” means that the species was found in locations with values higher than average. The symbol “-” means the reverse. The greater the number of symbols, the higher the correlation; 0 indicates weak correlation. <sup>2</sup>Specialization factor. The symbol “\*” means the species was found occupying a narrower range of values than available. The greater the number of asterisks, the narrower the range; 0 indicates a very low specialization.
