# Supplementary material for: Ecological niche partitioning between Anopheles gambiae molecular forms in Cameroon: the ecological side of speciation
Source: PubMed Central journal article supplement (PMC2698860; doi:10.1186/1472-6785-9-17), 2009-05-21
Supplement: 1472-6785-9-17-S3.pdf [file 1472-6785-9-17-S3.pdf]

|                          | Factor 1 <sup>1</sup><br>(56%) | Factor 2 <sup>2</sup><br>(18%) | Factor 3 <sup>2</sup><br>(9%) |
|--------------------------|--------------------------------|--------------------------------|-------------------------------|
| Cropland                 | ++                             | *                              | 0                             |
| Distance to water bodies | 0                              | 0                              | 0                             |
| Distance to localities   | ----                           | 0                              | 0                             |
| Distance to roads        | ----                           | 0                              | 0                             |
| Evapotranspiration       | ++++                           | *****                          | *****                         |
| Evergreen Forest         | ---                            | **                             | ***                           |
| Sunlight exposure        | +++                            | **                             | *****                         |
| Forest/savannas mosaic   | 0                              | 0                              | 0                             |
| Rainfall                 | ---                            | 0                              | *                             |
| Dry savannas             | +                              | 0                              | 0                             |
| Deciduous woodland       | 0                              | *                              | *                             |
| Temperature              | ++                             | *                              | *                             |
| Altitude                 | 0                              | 0                              | **                            |
| Aspect                   | 0                              | 0                              | 0                             |
| Slope                    | -                              | 0                              | 0                             |
| Windspeed                | +++                            | *****                          | ***                           |
| Water vapor pressure     | ---                            | *                              | **                            |

<sup>1</sup>Marginality factor. The symbol “+” means that the species was found in locations with higher values than average. The symbol “-” means the reverse. The greater the number of symbols, the higher the correlation; 0 indicates weak correlation. <sup>2</sup>Specialization factor. The symbol “\*” means the species was found occupying a narrower range of values than available. The greater the number of asterisks, the narrower the range; 0 indicates a very low specialization.
