# Supplementary material for: Ecological niche partitioning between Anopheles gambiae molecular forms in Cameroon: the ecological side of speciation
Source: PubMed Central journal article supplement (PMC2698860; doi:10.1186/1472-6785-9-17), 2009-05-21
Supplement: 1472-6785-9-17-S4.pdf [file 1472-6785-9-17-S4.pdf]

|                           | Absolute<br>validation<br>index <sup>1</sup> | Contrast<br>validation<br>index <sup>2</sup> | Boyce Index <sup>3</sup> |           |
|---------------------------|----------------------------------------------|----------------------------------------------|--------------------------|-----------|
|                           |                                              |                                              | Continuous               | <i>B4</i> |
| <i>An. gambiae S form</i> |                                              |                                              |                          |           |
| Mean                      | 0.498                                        | 0.427                                        | 0.736                    | 1         |
| SD                        | 0.147                                        | 0.145                                        | 0.188                    | 0.0       |
| <i>An. gambiae M form</i> |                                              |                                              |                          |           |
| Mean                      | 0.483                                        | 0.395                                        | 0.377                    | 0.970     |
| SD                        | 0.202                                        | 0.199                                        | 0.395                    | 0.063     |
| <i>An. arabiensis</i>     |                                              |                                              |                          |           |
| Mean                      | 0.369                                        | 0.312                                        | 0.407                    | 0.948     |
| SD                        | 0.208                                        | 0.200                                        | 0.427                    | 0.078     |

<sup>1</sup> AVI varies from 0 to 1 ; <sup>2</sup> CVI varies from 0 to AVI ; <sup>3</sup> Boyce's indices vary from -1 to 1, with 0 indicating a random model (see text).
