# Supplementary material for: Ecological niche partitioning between Anopheles gambiae molecular forms in Cameroon: the ecological side of speciation
Source: PubMed Central journal article supplement (PMC2698860; doi:10.1186/1472-6785-9-17), 2009-05-21

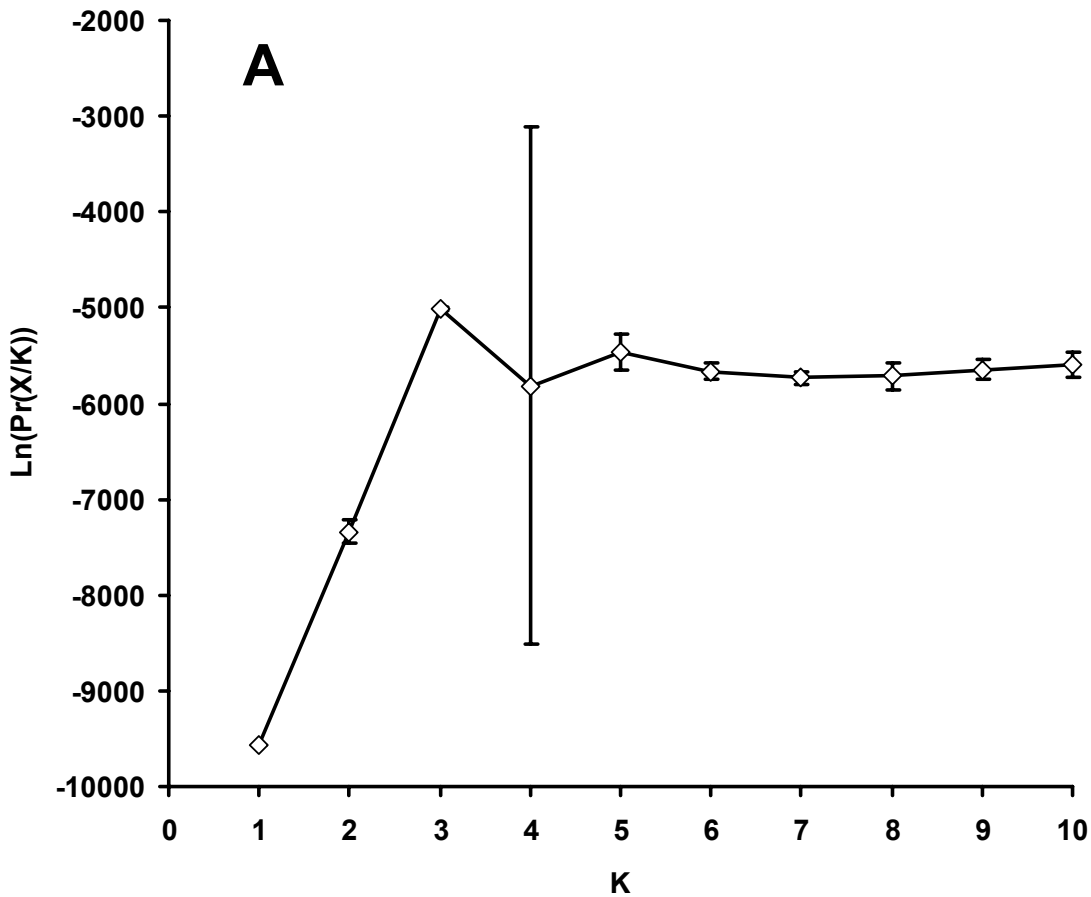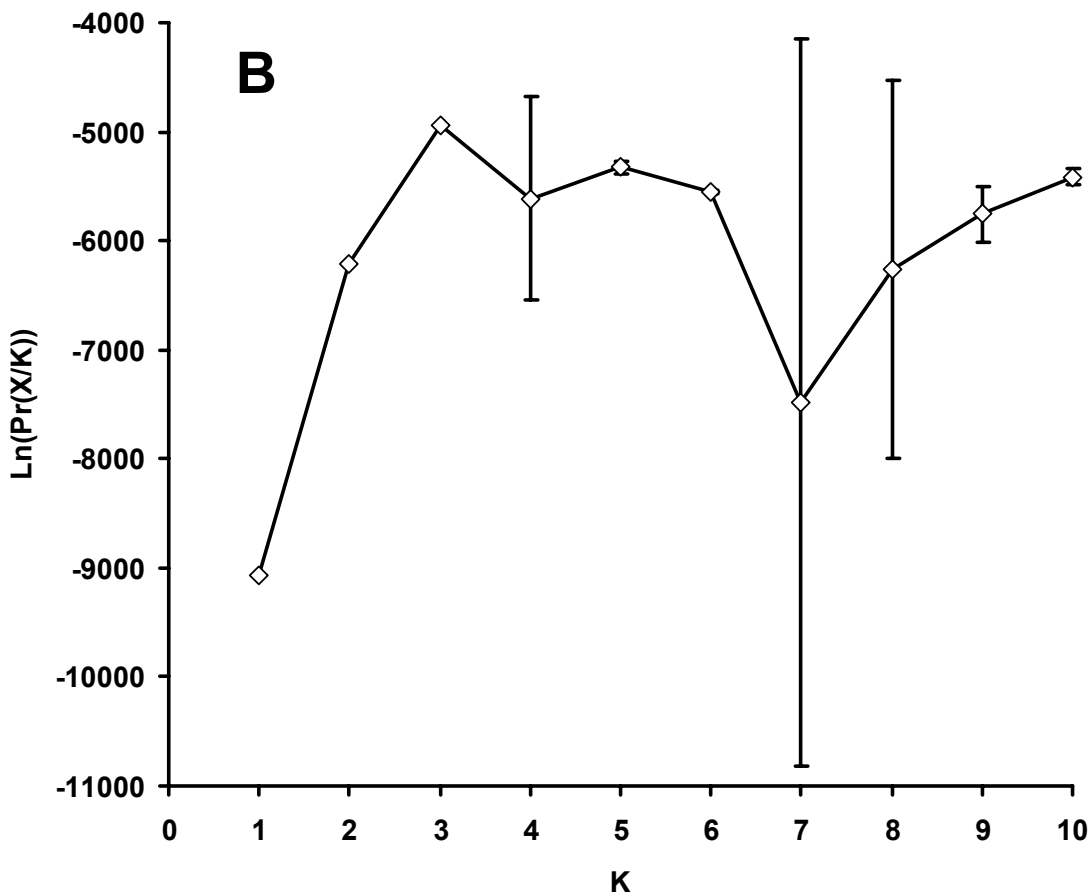

Supplement: 1472-6785-9-17-S5.pdf [file 1472-6785-9-17-S5.pdf]
