# Supplementary material for: Ecological niche partitioning between Anopheles gambiae molecular forms in Cameroon: the ecological side of speciation
Source: PubMed Central journal article supplement (PMC2698860; doi:10.1186/1472-6785-9-17), 2009-05-21
Supplement: 1472-6785-9-17-S6.pdf [file 1472-6785-9-17-S6.pdf]

| Locus and allele                            | Genetic Cluster <sup>a</sup> |                    |                 |
|---------------------------------------------|------------------------------|--------------------|-----------------|
|                                             | Cluster 1 (green)            | Cluster 2 (yellow) | Cluster 3 (red) |
| <i>System 2Rj</i>                           |                              |                    |                 |
| +                                           | 1.000                        | 1.000              | 1.000           |
| j                                           | 0.000                        | 0.000              | 0.000           |
| <i>System 2Rb</i>                           |                              |                    |                 |
| +                                           | 0.991                        | 0.126              | 0.016           |
| b                                           | 0.009                        | 0.873              | 0.352           |
| bc                                          | 0.000                        | 0.001              | 0.632           |
| <i>System 2Rd</i>                           |                              |                    |                 |
| +                                           | 1.000                        | 1.000              | 0.405           |
| d                                           | 0.000                        | 0.000              | 0.594           |
| u                                           | 0.000                        | 0.000              | 0.001           |
| <i>System 2La</i>                           |                              |                    |                 |
| +                                           | 0.995                        | 0.155              | 0.075           |
| a                                           | 0.005                        | 0.845              | 0.925           |
| <i>Proportion of membership<sup>b</sup></i> |                              |                    |                 |
| M form (N=136)                              | 0.749                        | 0.115              | 0.136           |
| S form (N=1,844)                            | 0.250                        | 0.324              | 0.426           |

<sup>a</sup> Numbering and colour codes for each genetic cluster are as defined in the text and Figure 6.

<sup>b</sup> Proportion of membership of each molecular form in each of the 3 inferred clusters.
