# Supplementary material for: Ecological niche partitioning between Anopheles gambiae molecular forms in Cameroon: the ecological side of speciation
Source: Springer Nature journal article supplement (doi:10.1186/1472-6785-9-17), 2009-01-01

10°0'0"E

15°0'0"E

- 1- 5 specimens
- 6- 10 specimens
- 11- 19 specimens
- ≥ 20 specimens

- An. arabiensis
- An. gambiae S
- An. gambiae M

- Collection points

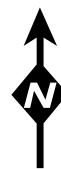

10°0'0"N

10°0'0"N

5°0'0"N

5°0'0"N

10°0'0"E

15°0'0"E

0 100 200 400 Km

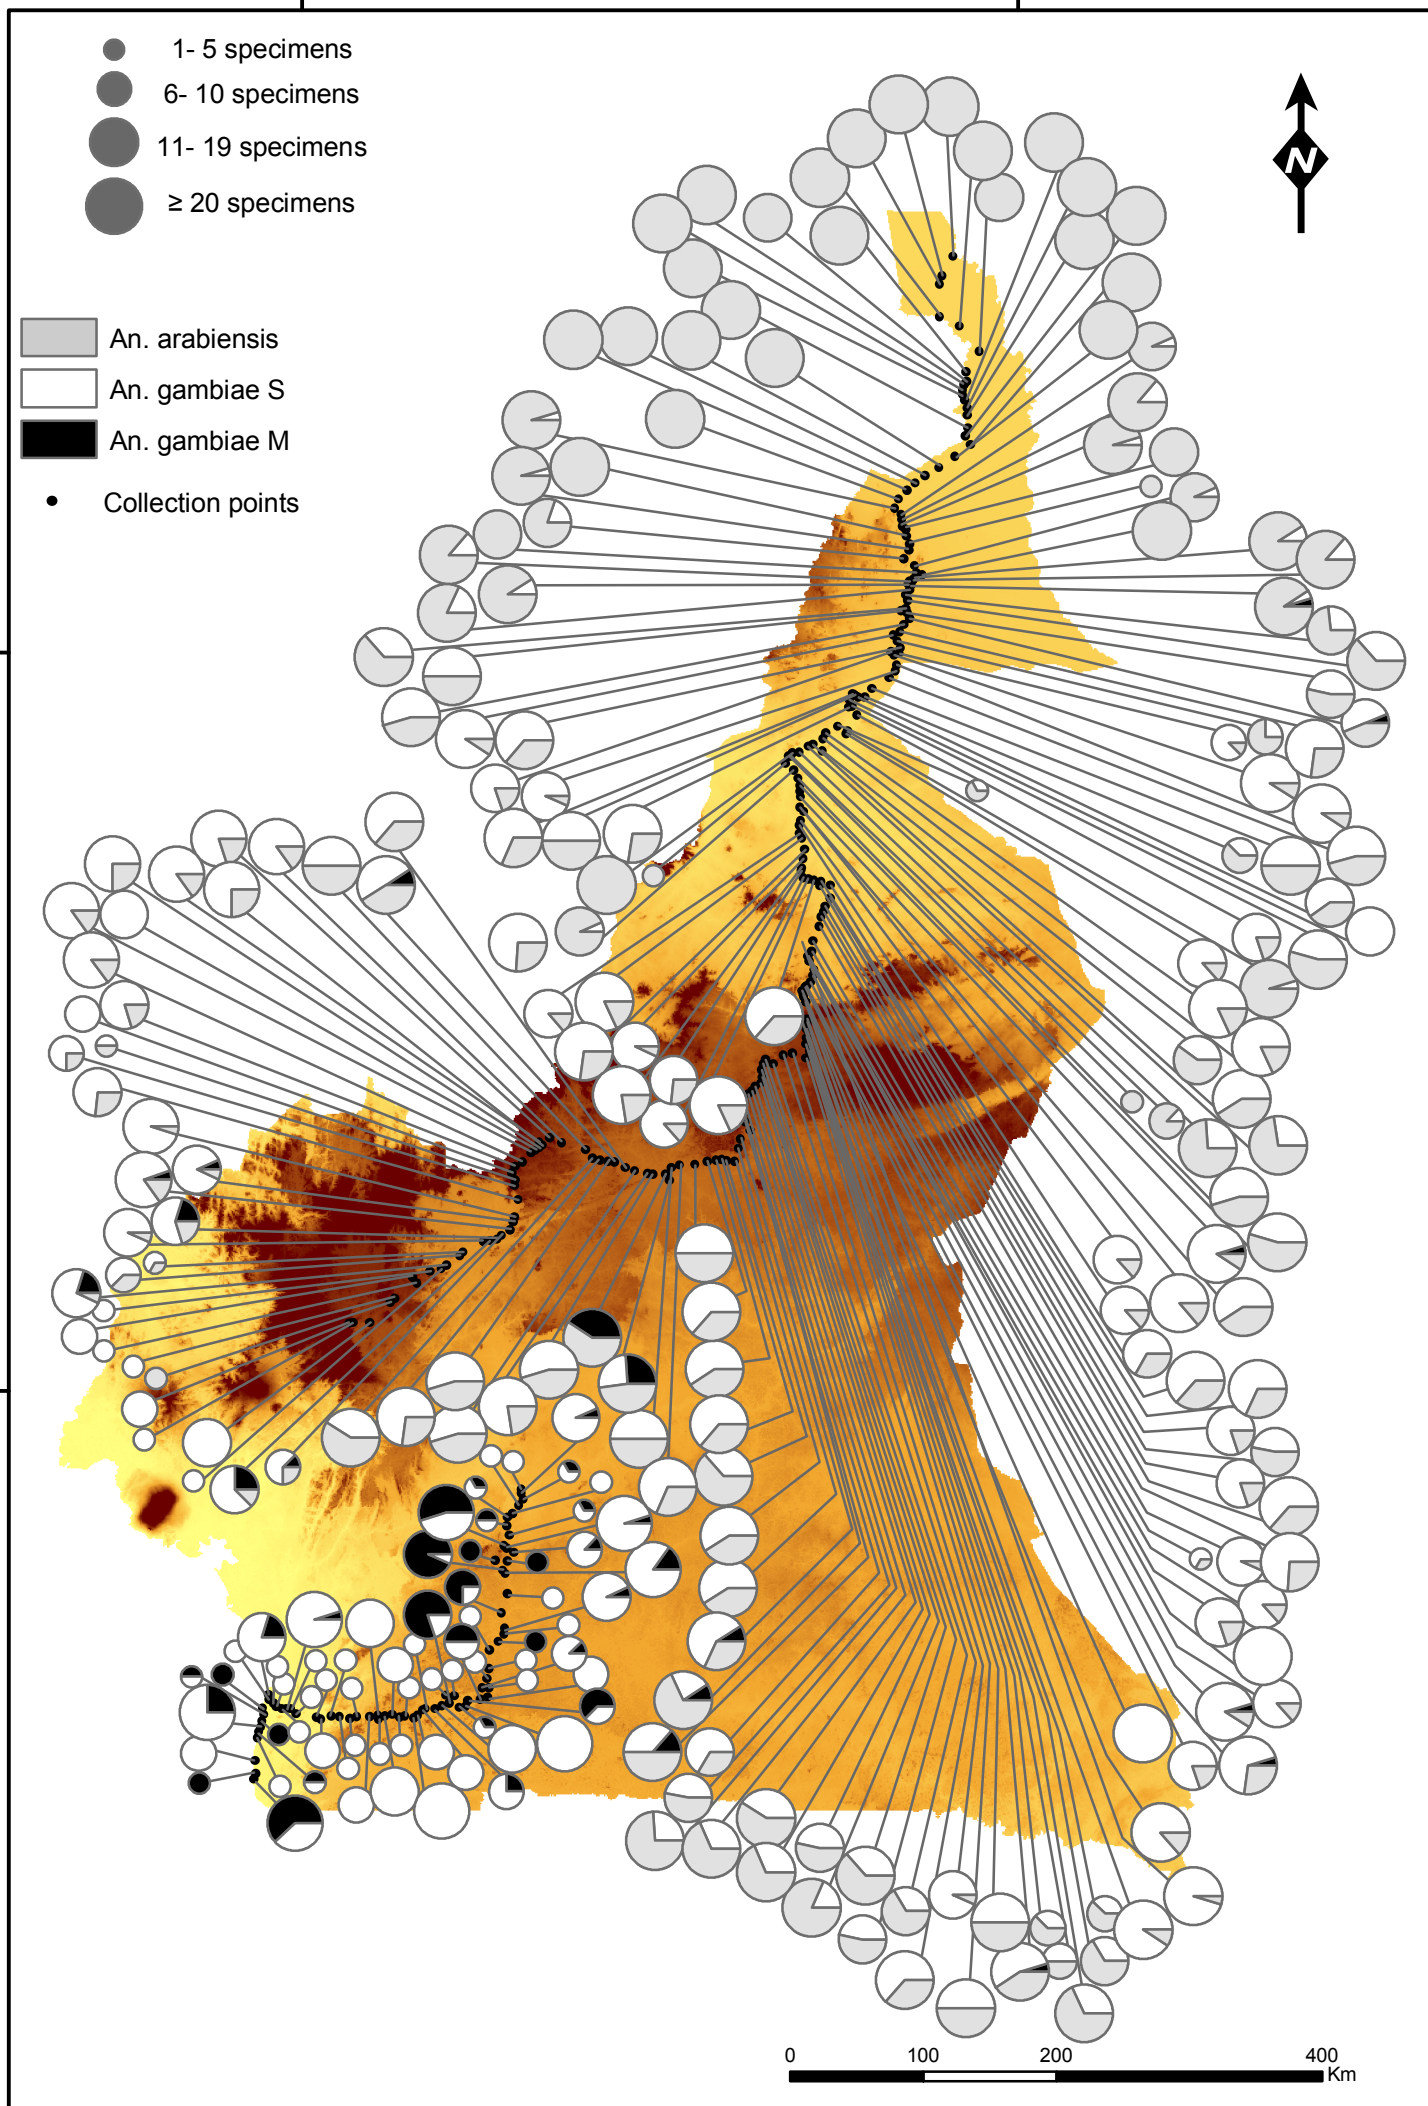

Supplement: 12898_2008_128_MOESM8_ESM.pdf [file 12898_2008_128_MOESM8_ESM.pdf]
