# Supplementary material for: Ecological niche partitioning between Anopheles gambiae molecular forms in Cameroon: the ecological side of speciation
Source: Springer Nature journal article supplement (doi:10.1186/1472-6785-9-17), 2009-01-01

**A**

**Sahelian Area**

---

**Tropical Dry**

---

**Adamaoua  
Highlands**

---

**Western Highlands**

---

**Central Plateau**

---

**Atlantic Coast**

**B**

**S-form**

**M-form**

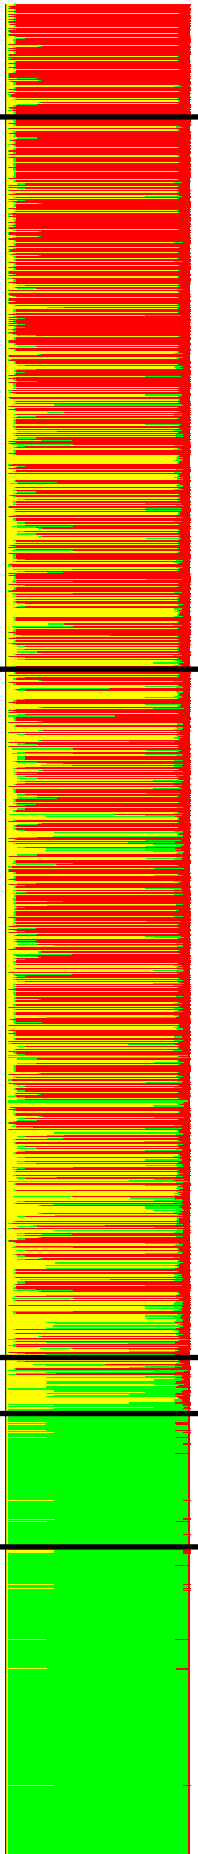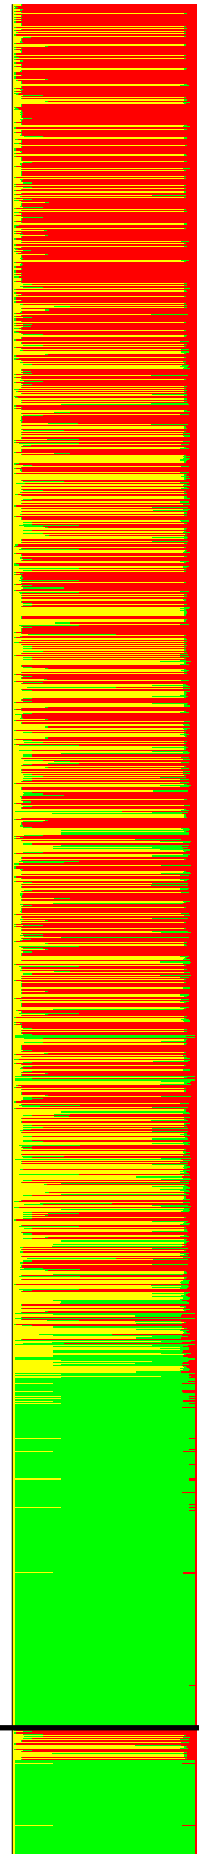

Supplement: 12898_2008_128_MOESM12_ESM.pdf [file 12898_2008_128_MOESM12_ESM.pdf]
