# Supplementary figures and images for: Ecological niche partitioning between Anopheles gambiae molecular forms in Cameroon: the ecological side of speciation
Source: Springer Nature journal article supplement (doi:10.1186/1472-6785-9-17), 2009-01-01

**A**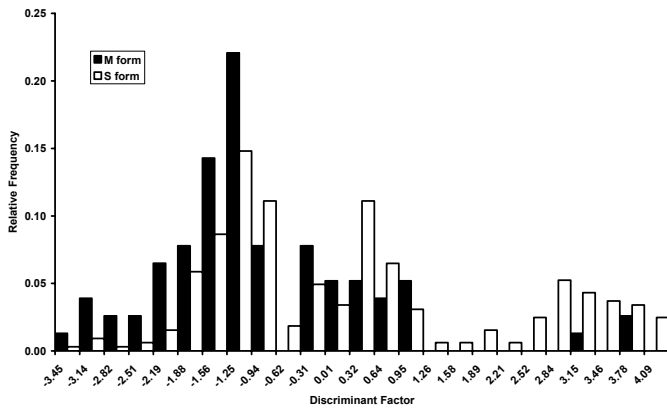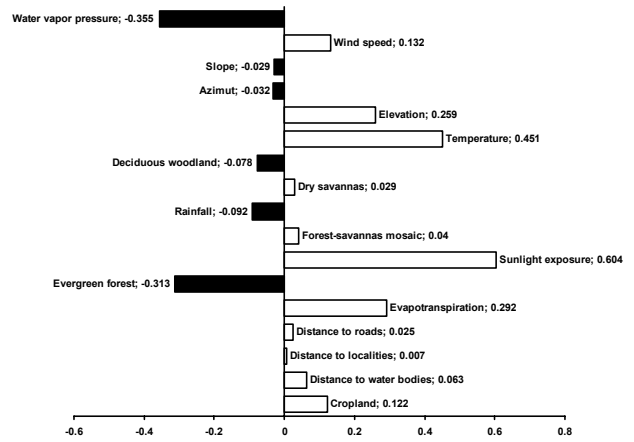**B**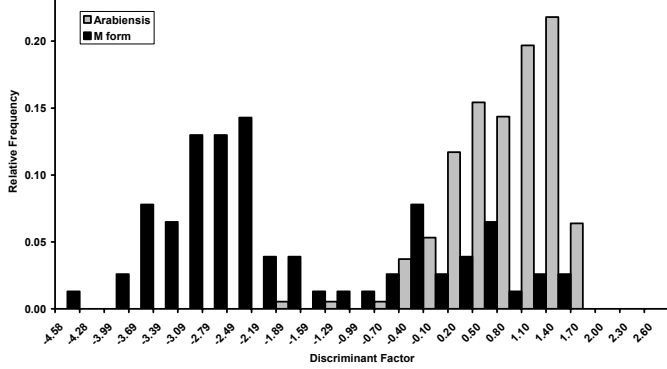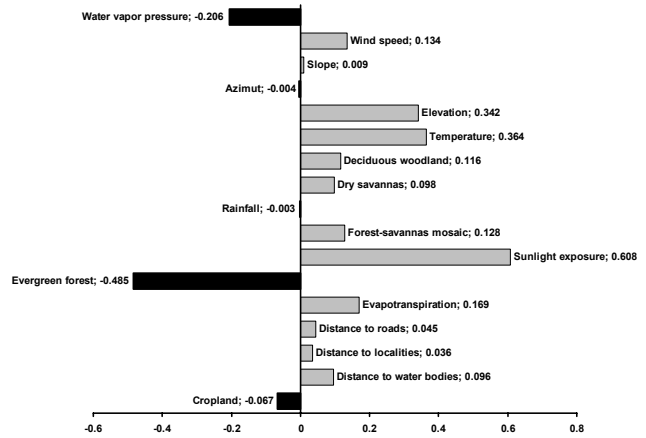**C**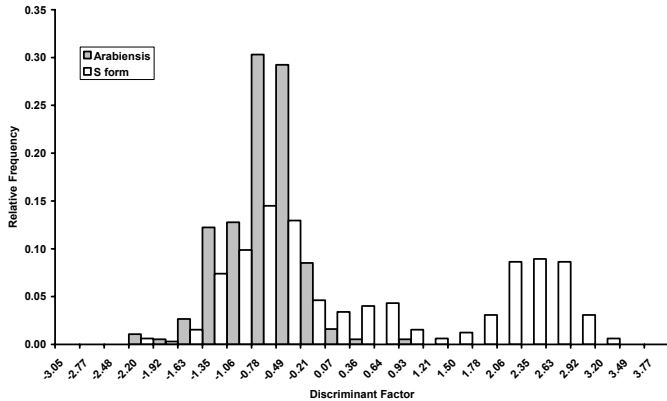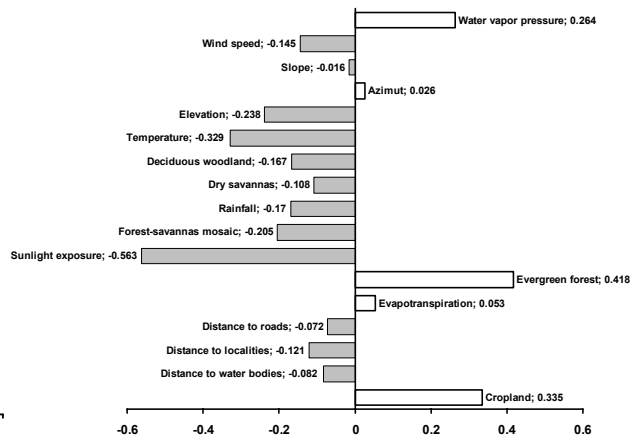

Supplement: 12898_2008_128_MOESM10_ESM.pdf [file 12898_2008_128_MOESM10_ESM.pdf]

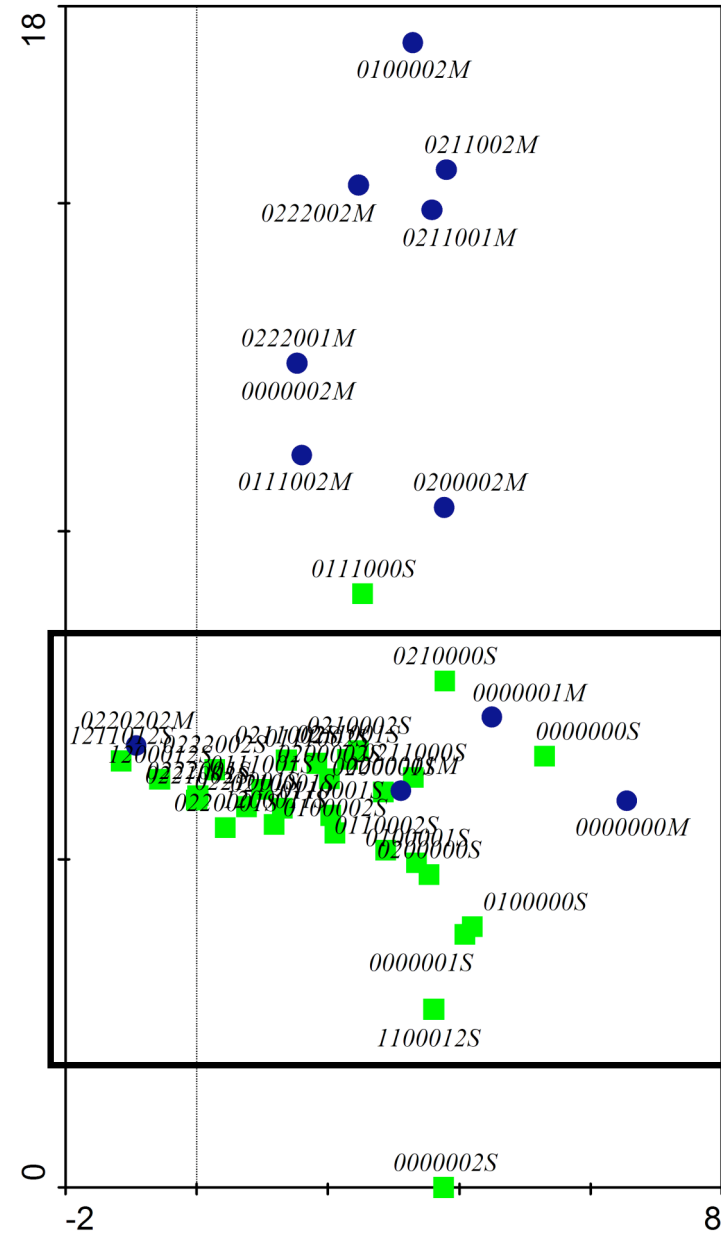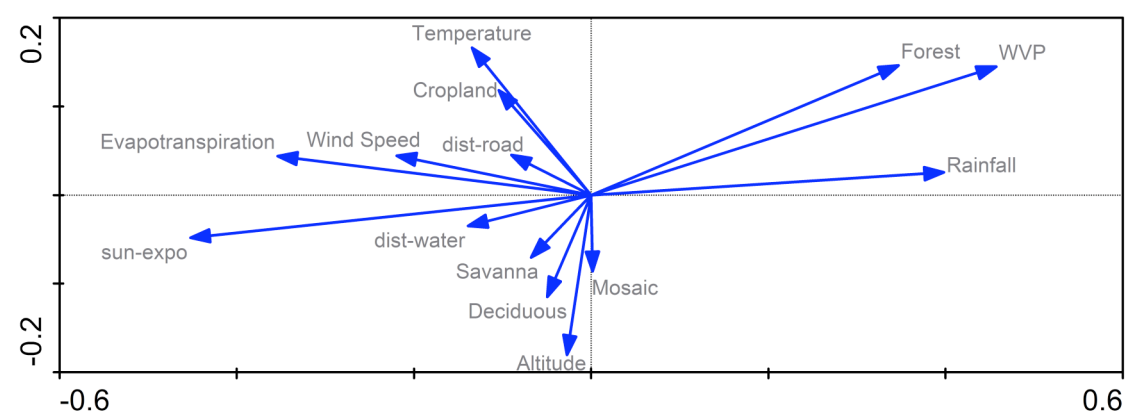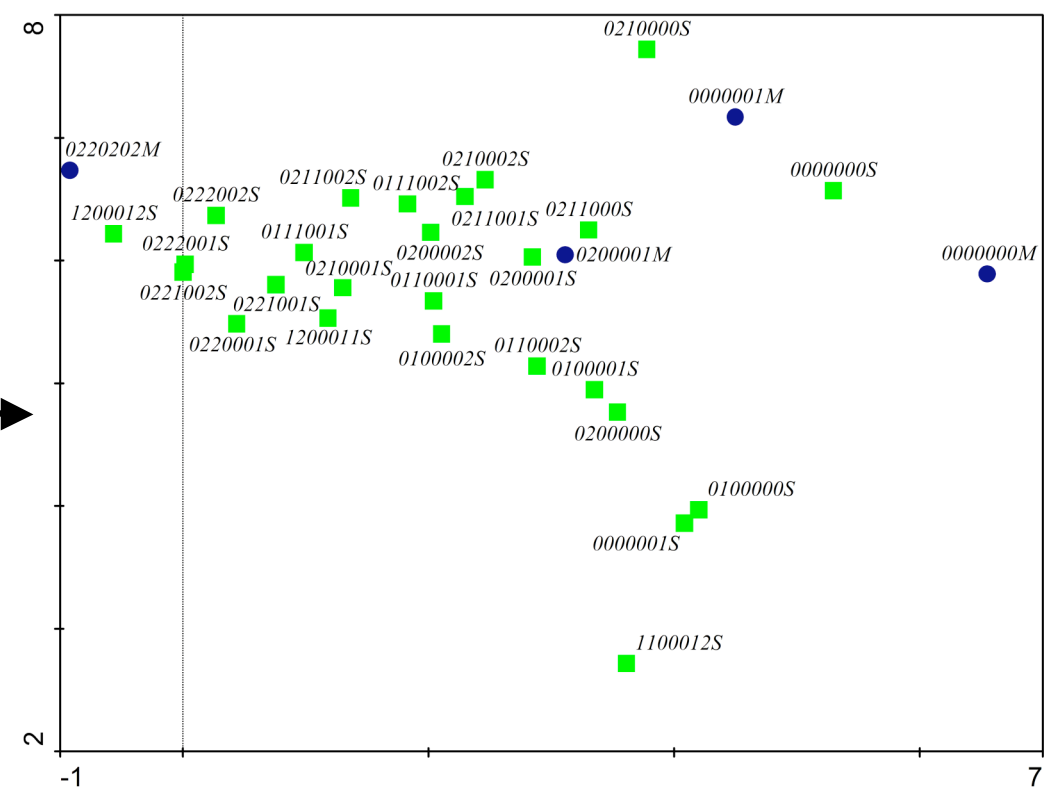

Supplement: 12898_2008_128_MOESM11_ESM.pdf [file 12898_2008_128_MOESM11_ESM.pdf]

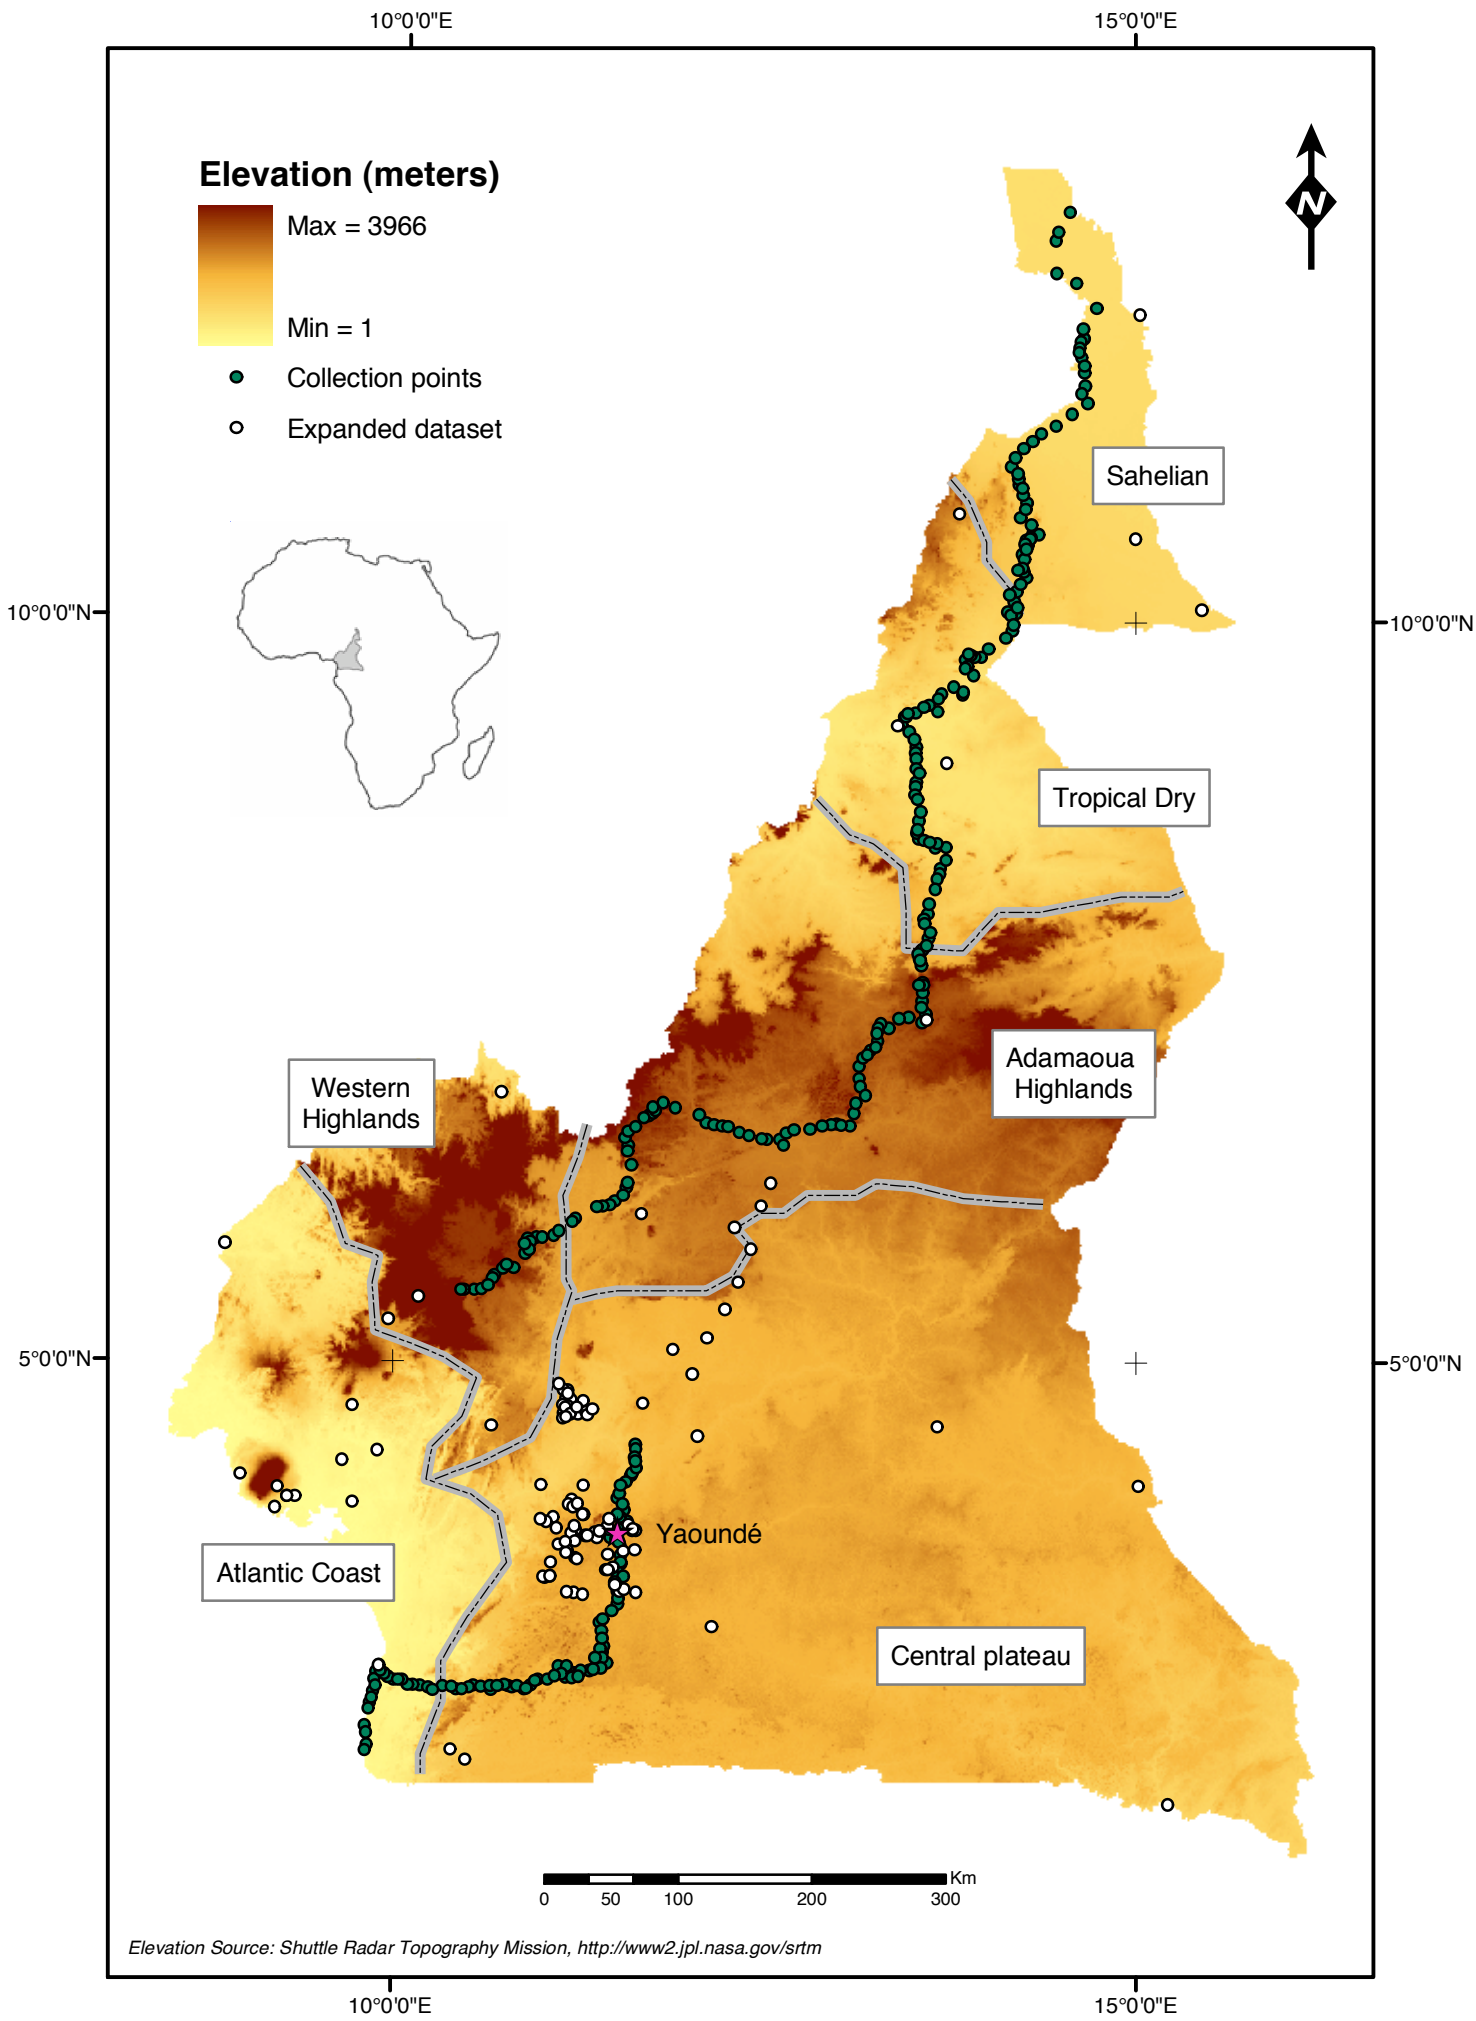

Supplement: 12898_2008_128_MOESM7_ESM.pdf [file 12898_2008_128_MOESM7_ESM.pdf]

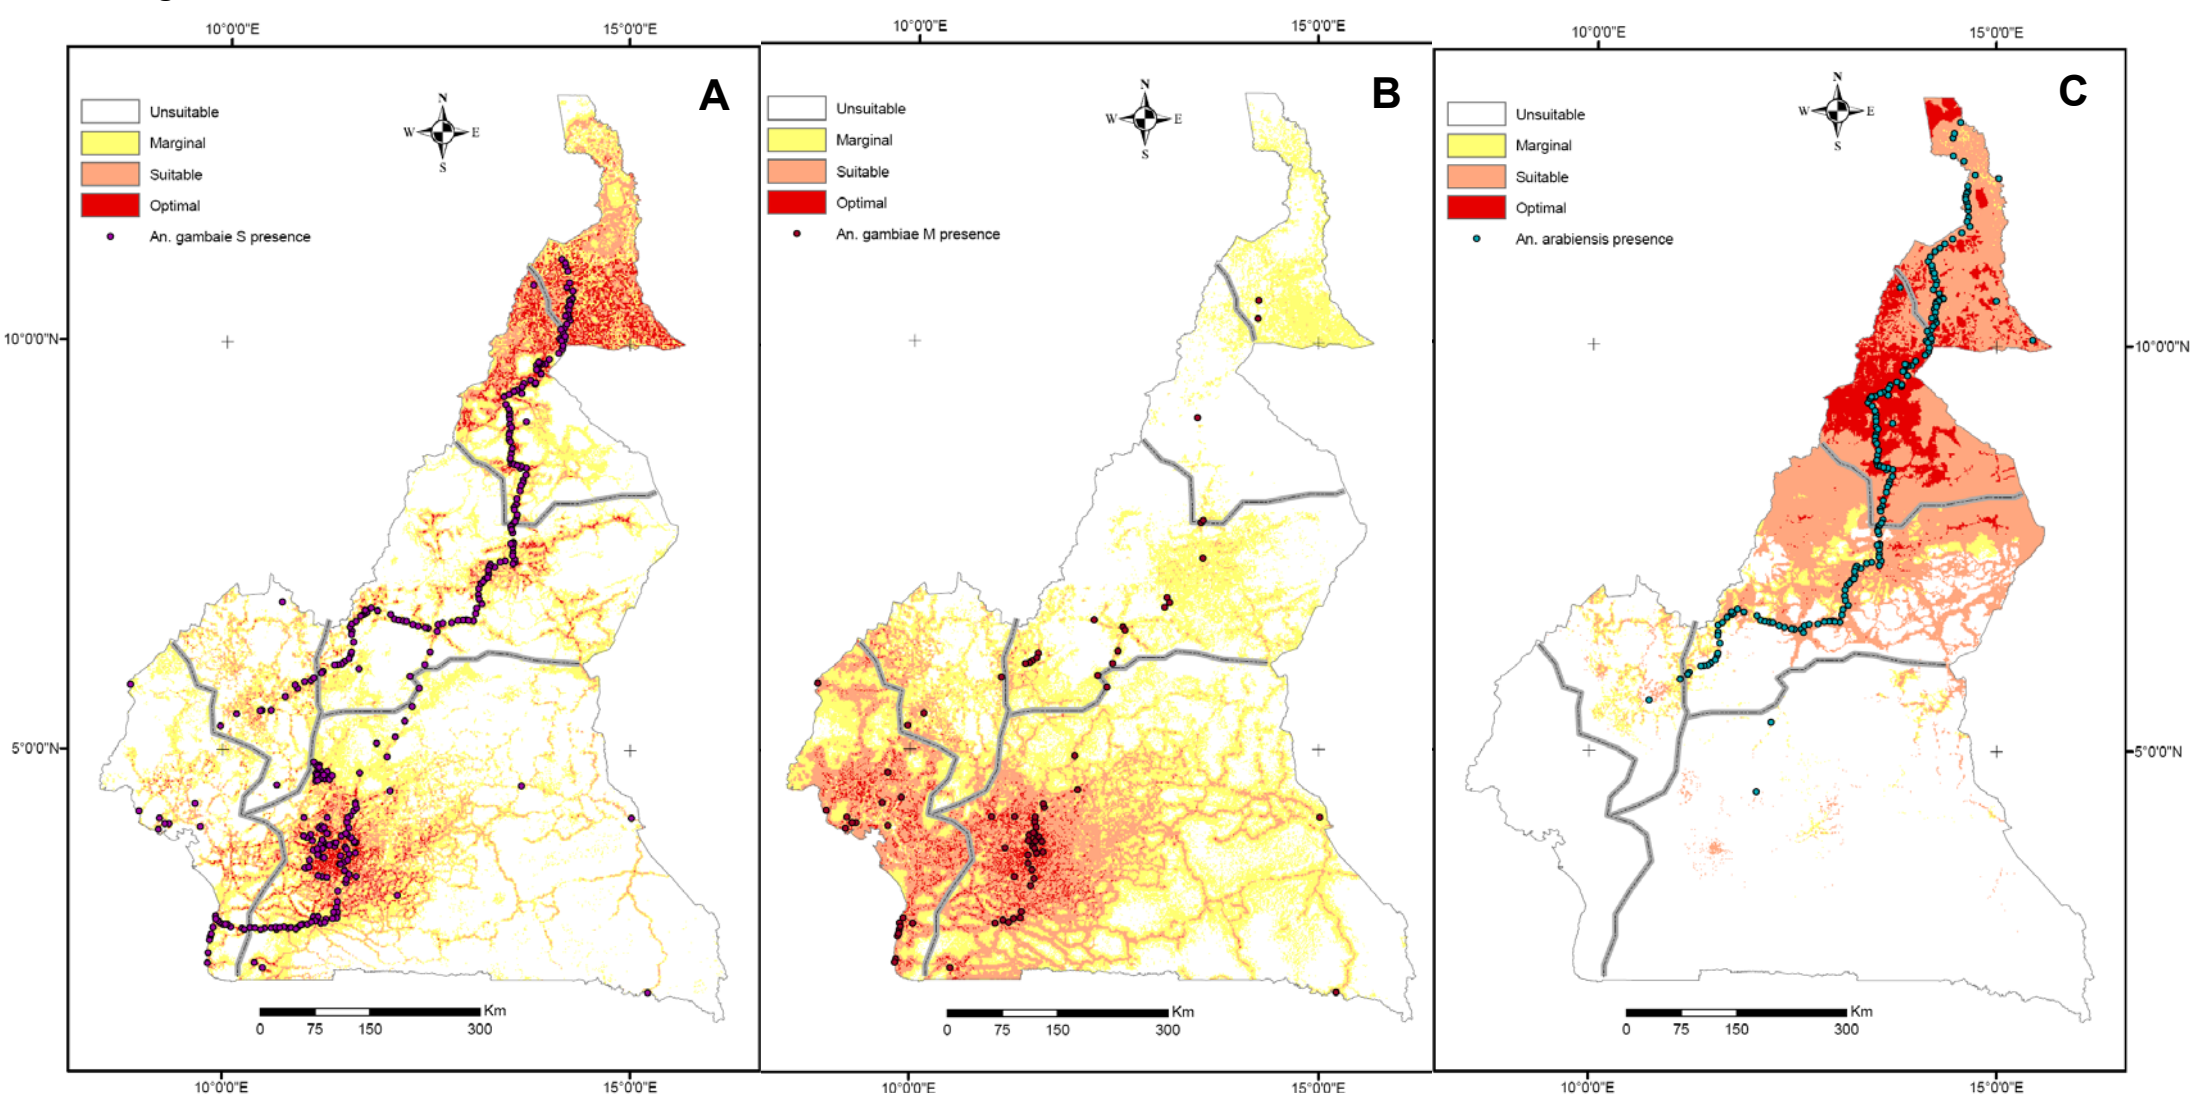

Supplement: 12898_2008_128_MOESM9_ESM.pdf [file 12898_2008_128_MOESM9_ESM.pdf]
